# Supplementary material for: Phase behavior of new aqueous two-phase systems: 1-Butyl-3-methylimidazolium tetrafluoroborate + anionic surfactants + water
Source: Royal Society of Chemistry journal article supplement (doi:10.1039/c1sm05072a), 2011-01-01
Supplement: c1sm05072a.pdf [file c1sm05072a.pdf]

## Supplementary Information

### **Phase behavior of new aqueous two-phase systems: 1-Butyl-3-methylimidazolium tetrafluoroborate + anionic surfactants +water**

Xi-Lian Wei<sup>\*a</sup>, Zeng-Bin Wei<sup>a</sup>, Xiu-Hong Wang<sup>a</sup>, Zhong-Ni Wang<sup>b</sup>, De-Zhi Sun<sup>a</sup>, Jie Liu<sup>a</sup>, Huai Hua Zhao<sup>a</sup>

<sup>a</sup> College of Chemistry and Chemical Engineering, Liaocheng University, Liaocheng, Shandong 252059, P. R. China

<sup>b</sup> Department of Chemistry, Shandong Normal University, Jinan 250014, P. R. China

### **Synthesis of long-chain ionic liquids 1-alkyl-3-methylimidazolium bromide [C<sub>n</sub>mim]Br) and 3-*p*-nonylphenoxy-2-hydroxypropyl trimethyl ammonium bromide (*p*-*n*-C<sub>9</sub>H<sub>19</sub>C<sub>6</sub>H<sub>4</sub>OCH<sub>2</sub>CH(OH)CH<sub>2</sub>NMe<sub>3</sub><sup>+</sup>Br<sup>-</sup>, NPTAB).**

#### **(1) Synthetic method of [C<sub>n</sub>mim]Br (n=8,10,12 and14)**

The IL samples were prepared according to the procedure reported by Wei et al.

Under a nitrogen atmosphere 1-methylimidazole and an excess molar amount of appropriate alkyl bromide were dissolved in dichloromethane, and the mixture was stirred at 75-80 °C for 48 h. The dichloromethane was then removed by the use of rotary evaporator under reduced pressure. The product was purified by recrystallization from ethyl acetate at least six times and then dried under vacuum for 1 day. The purity of the product was ascertained by <sup>1</sup>HNMR spectrum in CDCl<sub>3</sub>.

#### **<sup>1</sup>H NMR and elemental analysis dates of products**

##### **[C<sub>8</sub>mim]Br**

<sup>1</sup>HNMR: δH (400MHz, CDCl<sub>3</sub>), 0.871 (3H, t, -N(CH<sub>2</sub>)<sub>11</sub>CH<sub>3</sub>), 1.287(18H, m, -NCH<sub>2</sub>CH<sub>2</sub>(CH<sub>2</sub>)<sub>9</sub>CH<sub>3</sub>), 1.917(2H, t, -NCH<sub>2</sub>CH<sub>2</sub>(CH<sub>2</sub>)<sub>9</sub>-CH<sub>3</sub>), 4.140 (3H, s, -NCH<sub>3</sub>), 4.327 (2H, t, NCH<sub>2</sub>),

\* Corresponding author. Tel: +86-635-8230613; Fax: +86-635-8239196;  
E-mail: [weixilian@lcu.edu.cn](mailto:weixilian@lcu.edu.cn) or [weixilian@126.com](mailto:weixilian@126.com).

7.421 (1H, t,  $H(5)$ ), 7.583 (1H, t,  $H(4)$ ), 10.405(1H, s,  $H(2)$ ).

**Elemental analysis:** measured value (theoretical value) (%): C 52.86(52.36), H 8.58(8.36), N 10.84(10.26).

#### [C<sub>10</sub>mim]Br

**<sup>1</sup>HNMR:**  $\delta$ H (400MHz, CDCl<sub>3</sub>), 0.875 (3H, t, -N(CH<sub>2</sub>)<sub>11</sub>CH<sub>3</sub>), 1.301(18H, m, -NCH<sub>2</sub>CH<sub>2</sub>(CH<sub>2</sub>)<sub>9</sub>CH<sub>3</sub>), 1.920(2H, t, -NCH<sub>2</sub>CH<sub>2</sub>(CH<sub>2</sub>)<sub>9</sub>-CH<sub>3</sub>), 4.140 (3H, s, -NCH<sub>3</sub>), 4.326 (2H, t, NCH<sub>2</sub>), 7.440 (1H, d,  $H(5)$ ), 7.610 (1H, d,  $H(4)$ ), 10.362(1H, s,  $H(2)$ ).

**Elemental analysis:** measured value (theoretical value) (%): C 54.86(55.45), H 9.18(8.91), N 9.04(9.24).

#### [C<sub>12</sub>mim]Br·H<sub>2</sub>O

**<sup>1</sup>HNMR:**  $\delta$ H (400MHz, CDCl<sub>3</sub>), 0.879 (3H, t, -N(CH<sub>2</sub>)<sub>11</sub>CH<sub>3</sub>), 1.245(18H, t, -NCH<sub>2</sub>CH<sub>2</sub>(CH<sub>2</sub>)<sub>9</sub>CH<sub>3</sub>), 1.910(2H, s, -NCH<sub>2</sub>CH<sub>2</sub>(CH<sub>2</sub>)<sub>9</sub>-CH<sub>3</sub>), 4.138 (3H, s, -NCH<sub>3</sub>), 4.321 (2H, t, NCH<sub>2</sub>), 7.368 (1H, t,  $H(5)$ ), 7.510 (1H, t,  $H(4)$ ), 10.369 (1H, d,  $H(2)$ ).

**Elemental analysis:** measured value (theoretical value) (%): C 54.86(55.01), H 9.98(9.52), N 8.04(8.02).

#### [C<sub>14</sub>mim]Br·H<sub>2</sub>O

**<sup>1</sup>HNMR:**  $\delta$ H (400MHz, CDCl<sub>3</sub>), 0.878 (3H, t, -N(CH<sub>2</sub>)<sub>11</sub>CH<sub>3</sub>), 1.248(18H, t, -NCH<sub>2</sub>CH<sub>2</sub>(CH<sub>2</sub>)<sub>9</sub>CH<sub>3</sub>), 1.914(2H, s, -NCH<sub>2</sub>CH<sub>2</sub>(CH<sub>2</sub>)<sub>9</sub>-CH<sub>3</sub>), 4.139 (3H, s, -NCH<sub>3</sub>), 4.321 (2H, t, NCH<sub>2</sub>), 7.404 (1H, t,  $H(5)$ ), 7.572 (1H, t,  $H(4)$ ), 10.429 (1H, d,  $H(2)$ ).

**Elemental analysis:** measured value (theoretical value) (%): C 59.59(59.25), H 10.68(10.19), N 6.91(6.91).

## (2) Synthetic method of NPTAB

### The molecular structure of NPTAB

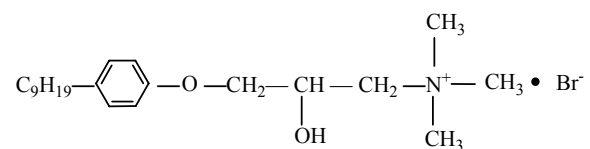

### Synthetic method of NPTAB

*p*-nonyl phenol (22 g, 0.1mol), toluene (50 ml) and 10g sodium hydroxide aqueous liquid (40%) were added into the 250ml round bottom flask equipped with condenser tube. The mixture

was stirred and heated to 50°C, 14g(0.115mol) epichlorohydrin was added to mixture and was reflux for 2-4 h in the presence of tetrabutyl ammonium bromide as phase transfer catalyst at 50°C -80°C. The reaction was stopped and the product was first washed 2-3 times with hot water, and then product was dried with anhydrous sodium sulfate, the solvent was removed under reduced pressure to afford the *p*-nonylphenyl glycidyl ether, and finally the NPTAB was synthesized by the reaction of trimethyl ammonium bromide with *p*-nonylphenyl glycidyl ether and was purified by recrystallization from ethyl acetate three times, Yield: 70~85%, the purity of the final product was determined by surface tension measurements.

### **<sup>1</sup>H NMR and elemental analysis data of products**

**<sup>1</sup>H NMR:** δH (400MHz, CDCl<sub>3</sub>, TMS) 0.70 (3H, t, CH<sub>3</sub>CH<sub>2</sub>), 1.0~1.6 [14H,m, CH<sub>3</sub>(CH<sub>2</sub>)<sub>7</sub>], 2.86 (2H, CH<sub>2</sub>C<sub>6</sub>H<sub>4</sub>), 3.49 [9H,s, N(CH<sub>3</sub>)], 3.75(2H,d,OCH<sub>2</sub>CH), 6.7~7.2 (4H,b, C<sub>6</sub>H<sub>4</sub>).

**Elemental analysis:** measured value (theoretical value) (%): C 60.0 (60.58), H 10.0 (9.13), N 4.0(3.36), O, 7.8(7.69).
